# Supplementary material for: Planar Dy3+ Dy3clusters: design, structure and axial ligand perturbed magnetic dynamics
Source: Royal Society of Chemistry journal article supplement (doi:10.1039/c5dt03931b), 2015-01-01
Supplement: c5dt03931b1.pdf [file c5dt03931b1.pdf]

## Supporting Information for:

# Planar Dy<sub>3</sub>+Dy<sub>3</sub> clusters: Design, structures and axial ligands perturbed magnetic dynamics

### *Experimental Section*

**General.** All starting materials were of A.R. Grade and were used as commercially obtained without further purification. 4,6-dihydrazinopyrimidine was prepared according to a previously published method.<sup>1</sup>

Elemental analyses for C, H, and N were carried out on a Perkin-Elmer 2400 analyzer. Fourier transform IR (FTIR) spectra were recorded with a Perkin-Elmer FTIR spectrophotometer using the reflectance technique (4000–300 cm<sup>-1</sup>). Samples were prepared as KBr disks. All magnetization data were recorded on a Quantum Design MPMS-XL7 SQUID magnetometer equipped with a 7 T magnet. The variable-temperature magnetization was measured with an external magnetic field of 1000 Oe in the temperature range of 1.9–300 K. The experimental magnetic susceptibility data are corrected for the diamagnetism estimated from Pascal's tables and sample holder calibration.

### **Synthesis of the Complex Dy<sub>6</sub>-SCN**

[Dy<sub>6</sub>L<sub>2</sub>(μ<sub>3</sub>-OH)<sub>4</sub>(μ<sub>2</sub>-OH)<sub>2</sub>(SCN)<sub>8</sub>(H<sub>2</sub>O)<sub>4</sub>]·6CH<sub>3</sub>CN·2CH<sub>3</sub>OH·H<sub>2</sub>O (**Dy<sub>6</sub>-SCN**).

4,6-dihydrazinopyrimidine (0.1 mmol) was dissolved in a mixture of methanol and acetonitrile (1:2, 15 mL), and then o-vanillin (0.2 mmol) was added to the mixture. The reaction mixture was stirred for 5 min. Then, triethylamine (0.3 mmol) and Dy(SCN)<sub>3</sub>·6H<sub>2</sub>O (0.2 mmol) were added after 5 min successively. The reaction mixture was stirred at room temperature for 4 h and the resultant solution was left unperturbed to allow for slow evaporation of the solvent. Yellow single crystals of complex **Dy<sub>6</sub>-SCN** were obtained after two days. Yield: 20 mg, (21.8 %, based on the metal salt). Elemental analysis (%) calcd for C<sub>31</sub>H<sub>35.25</sub>Dy<sub>3</sub>N<sub>13.25</sub>O<sub>10.5</sub>S<sub>4</sub>: C, 27.04, H, 2.58, N, 13.48; found C, 27.08, H, 2.60, N, 13.46. IR (KBr, cm<sup>-1</sup>): 3277 (w), 3204 (w), 2045 (s), 1617 (s), 1509 (m), 1503 (m), 1484 (m), 1460 (s), 1423 (m), 1320 (s), 1292 (m), 1218 (s), 1197 (s), 1167 (w) 1115 (s), 1078 (m), 1009 (m) 750 (m), 737 (s).

### Synthesis of the Complex $\text{Dy}_6\text{-NO}_3$

$[\text{Dy}_6\text{L}_2(\mu_3\text{-OH})_4(\mu_2\text{-OH})_2(\text{NO}_3)_6(\text{H}_2\text{O})_6] \cdot 2\text{NO}_3 \cdot 10\text{H}_2\text{O}$  ( $\text{Dy}_6\text{-NO}_3$ ).

4,6-dihydrazinopyrimidine (0.1 mmol) was dissolved in a mixture of methanol and acetonitrile (1:2, 15 mL), and then o-vanillin (0.2 mmol) was added to the mixture. The reaction mixture was stirred for 5 min. Then, triethylamine (0.3 mmol) and  $\text{Dy}(\text{NO}_3)_3 \cdot 6\text{H}_2\text{O}$  (0.1 mmol) were added after 5 min successively. The reaction mixture was stirred at room temperature for 4 h and the resultant solution was left unperturbed to allow for slow evaporation of the solvent. Yellow single crystals of complex  $\text{Dy}_6\text{-NO}_3$  were obtained after a week. Yield: 11 mg, (24.9 %, based on the metal salt). Elemental analysis (%) calcd for  $\text{C}_{44}\text{H}_{54}\text{Dy}_6\text{N}_{16}\text{O}_{54}$ : C, 19.97, H, 2.06, N, 8.47; found C, 19.95, H, 2.07, N, 8.46. IR (KBr,  $\text{cm}^{-1}$ ): 3428 (m), 3191 (m), 1620 (s), 1517 (w), 1460 (m), 1427 (m), 1322 (s), 1290 (m), 1219 (m), 1199 (m), 1116 (w), 1079 (w), 1044 (w), 946 (w), 857 (w), 815 (w), 780 (w), 735 (m).

### X-ray Crystallography.

Crystallographic data and refinement details are given in Table S3. Suitable single crystal of  $\text{Dy}_6\text{-SCN}$  and  $\text{Dy}_6\text{-NO}_3$  were selected for single-crystal X-ray diffraction analysis. Crystallographic data were collected at 296(1) and 113(1) K on a Bruker ApexII CCD diffractometer and with graphite monochromated Mo  $K\alpha$  radiation ( $\lambda = 0.71073 \text{ \AA}$ ). The structures were solved by direct methods and refined by the full-matrix least-squares method based on  $F^2$  with anisotropic thermal parameters for all non-hydrogen atoms by using the SHELXS (direct methods) and refined by SHELXL (full matrix least-squares techniques) in the Olex2 package.<sup>2</sup> The locations of Dy atom were easily determined, and O, N, C and S atoms were subsequently determined from the difference Fourier maps. Anisotropic thermal parameters were assigned to all non-hydrogen atoms. The H atoms were introduced in calculated positions and refined with a fixed geometry with respect to their carrier atoms. CCDC 1419275 ( $\text{Dy}_6\text{-SCN}$ ) and 1419276 ( $\text{Dy}_6\text{-NO}_3$ ) contain the supplementary crystallographic data for this paper. These data can be obtained free of charge from the Cambridge Crystallographic Data Centre via [www.ccdc.cam.ac.uk/data\\_request/cif](http://www.ccdc.cam.ac.uk/data_request/cif).

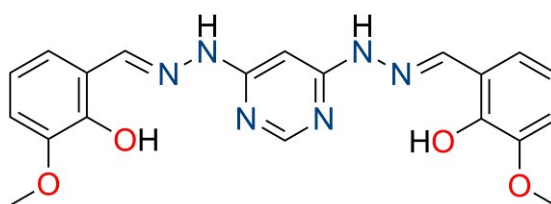

Scheme S1. Structure of the H<sub>2</sub>L ligand.

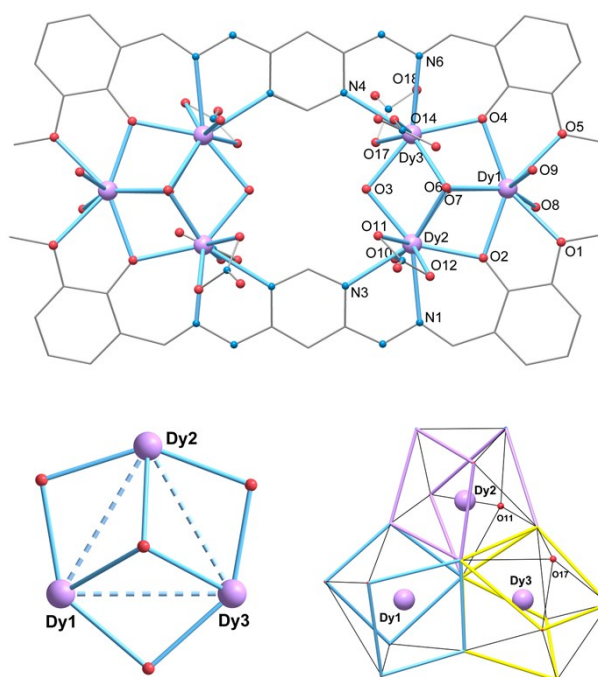

Fig. S1 (top) Partially labeled  $\text{Dy}_3$  structures of complex  $\text{Dy}_6\text{-NO}_3$  with H atoms omitted for clarity. Color scheme: pink, Dy; red, O; blue, N. (bottom left) Overall central core for  $\text{Dy}_6\text{-NO}_3$ . (bottom right) Coordination polyhedra observed in  $\text{Dy}_6\text{-NO}_3$ : square-antiprismatic environment for Dy1 and mono-capped square antiprism geometries for Dy2/Dy3.

Table S1.  $\text{Dy}^{\text{III}}$  geometry analysis of  $\text{Dy}_6\text{-SCN}$  by SHAPE 2.1 software.

| $\text{Dy}^{\text{III}}$    | Triangular<br>dodecahedron<br>( $D_{2d}$ ) | Square<br>antiprism<br>( $D_{4d}$ ) | Biaugmented<br>trigonal<br>prism<br>( $C_{2v}$ ) | Biaugmented<br>trigonal prism<br>( $C_{2v}$ ) | Snub<br>diphenoid<br>J84 ( $D_{2d}$ ) |
|-----------------------------|--------------------------------------------|-------------------------------------|--------------------------------------------------|-----------------------------------------------|---------------------------------------|
| $\text{Dy}^{\text{III}}(1)$ | 1.930                                      | <b>1.382</b>                        | 2.786                                            | 3.322                                         | 5.021                                 |
| $\text{Dy}^{\text{III}}(2)$ | <b>0.840</b>                               | 3.005                               | 2.315                                            | 2.596                                         | 2.057                                 |
| $\text{Dy}^{\text{III}}(3)$ | <b>1.008</b>                               | 2.539                               | 1.877                                            | 2.342                                         | 2.102                                 |

Table S2. Dy<sup>III</sup> geometry analysis of **Dy<sub>6</sub>-NO<sub>3</sub>** by SHAPE 2.1 software.

|                       |                                                                    |                                                                        |                                                       |                                                                          |                                                     |
|-----------------------|--------------------------------------------------------------------|------------------------------------------------------------------------|-------------------------------------------------------|--------------------------------------------------------------------------|-----------------------------------------------------|
| Dy <sup>III</sup>     | Triangular<br>dodecahedron<br>( <i>D</i> <sub>2d</sub> )           | Square<br>antiprism ( <i>D</i> <sub>4d</sub> )                         | Biaugmented<br>trigonal<br>( <i>C</i> <sub>2v</sub> ) | Biaugmented<br>prism<br>trigonal<br>J50 ( <i>C</i> <sub>2v</sub> )       | Snub<br>diphenoid<br>J84 ( <i>D</i> <sub>2d</sub> ) |
| Dy <sup>III</sup> (1) | 1.982                                                              | <b>1.418</b>                                                           | 2.884                                                 | 3.525                                                                    | 4.981                                               |
|                       | Spherical capped<br>square antiprism<br>( <i>C</i> <sub>4v</sub> ) | Spherical<br>tricapped<br>trigonal prism<br>( <i>D</i> <sub>3h</sub> ) | Capped<br>antiprism<br>( <i>C</i> <sub>4v</sub> )     | square<br>J10<br>Tricapped<br>trigonal<br>J51 ( <i>D</i> <sub>3h</sub> ) | Muffin ( <i>C</i> <sub>s</sub> )                    |
| Dy <sup>III</sup> (2) | <b>1.884</b>                                                       | 2.081                                                                  | 2.410                                                 | 2.532                                                                    | 2.505                                               |
| Dy <sup>III</sup> (3) | <b>1.599</b>                                                       | 2.220                                                                  | 2.436                                                 | 2.514                                                                    | 2.318                                               |

Table S3. Crystal data and structure refinement for complexes **Dy<sub>6</sub>-NO<sub>3</sub>** and **Dy<sub>6</sub>-SCN**.

| Compound                                                                   | <b>Dy<sub>6</sub>-NO<sub>3</sub></b>                                            | <b>Dy<sub>6</sub>-SCN</b>                                                                              |
|----------------------------------------------------------------------------|---------------------------------------------------------------------------------|--------------------------------------------------------------------------------------------------------|
| Empirical formula                                                          | C <sub>44</sub> H <sub>54</sub> Dy <sub>6</sub> N <sub>16</sub> O <sub>54</sub> | C <sub>31</sub> H <sub>35.25</sub> Dy <sub>3</sub> N <sub>13.25</sub> O <sub>10.5</sub> S <sub>4</sub> |
| Fw (g/mol)                                                                 | 2654.03                                                                         | 1377.21                                                                                                |
| Temperature/K                                                              | 296.15                                                                          | 113.1500                                                                                               |
| Crystal system                                                             | Triclinic                                                                       | Monoclinic                                                                                             |
| Space group                                                                | P $\bar{1}$                                                                     | C2/c                                                                                                   |
| <i>a</i> /Å                                                                | 10.7890(11)                                                                     | 40.411(8)                                                                                              |
| <i>b</i> /Å                                                                | 12.7071(13)                                                                     | 11.713(2)                                                                                              |
| <i>c</i> /Å                                                                | 16.9727(18)                                                                     | 30.558(6)                                                                                              |
| $\alpha$ /°                                                                | 100.954(2)                                                                      | 90                                                                                                     |
| $\beta$ /°                                                                 | 100.243(2)                                                                      | 129.65(3)                                                                                              |
| $\gamma$ /°                                                                | 109.293(2)                                                                      | 90                                                                                                     |
| <i>V</i> /Å <sup>3</sup>                                                   | 2082.3(4)                                                                       | 11137(5)                                                                                               |
| <i>Z</i>                                                                   | 1                                                                               | 8                                                                                                      |
| $\rho_{\text{calc}}$ (g/cm <sup>3</sup> )                                  | 2.117                                                                           | 1.643                                                                                                  |
| <i>F</i> (000)                                                             | 1262.0                                                                          | 5280.0                                                                                                 |
| <i>R</i> <sub>int</sub>                                                    | 0.0309                                                                          | 0.0775                                                                                                 |
| <i>R</i> <sub>1</sub> <i>wR</i> <sub>2</sub> [ <i>I</i> > =2σ( <i>I</i> )] | 0.0451, 0.1270                                                                  | 0.0741, 0.1806                                                                                         |
| <i>R</i> <sub>1</sub> <i>wR</i> <sub>2</sub> [all data]                    | 0.0599, 0.1393                                                                  | 0.0955, 0.1932                                                                                         |
| GoF                                                                        | 1.047                                                                           | 1.096                                                                                                  |

Table S4. The corresponding distances and angles of Dy<sub>3</sub> triangle in complexes **Dy<sub>6</sub>-NO<sub>3</sub>** and **Dy<sub>6</sub>-SCN**.

|                                            | <b>Dy<sub>6</sub>-NO<sub>3</sub></b> | <b>Dy<sub>6</sub>-SCN</b> |
|--------------------------------------------|--------------------------------------|---------------------------|
| Dy1-Dy2                                    | 3.523 Å                              | 3.540 Å                   |
| Dy1-Dy3                                    | 3.512 Å                              | 3.534 Å                   |
| Dy2-Dy3                                    | 3.519 Å                              | 3.505 Å                   |
| Dy1-Dy2-Dy3                                | 59.835°                              | 60.206°                   |
| Dy2-Dy3-Dy1                                | 60.142°                              | 60.390°                   |
| Dy3-Dy1-Dy2                                | 60.023°                              | 59.403°                   |
| Dihedral Angle                             | 0°                                   | 5.153°                    |
| Distance between two Dy <sub>3</sub> plans | 0.2361 Å                             | –                         |

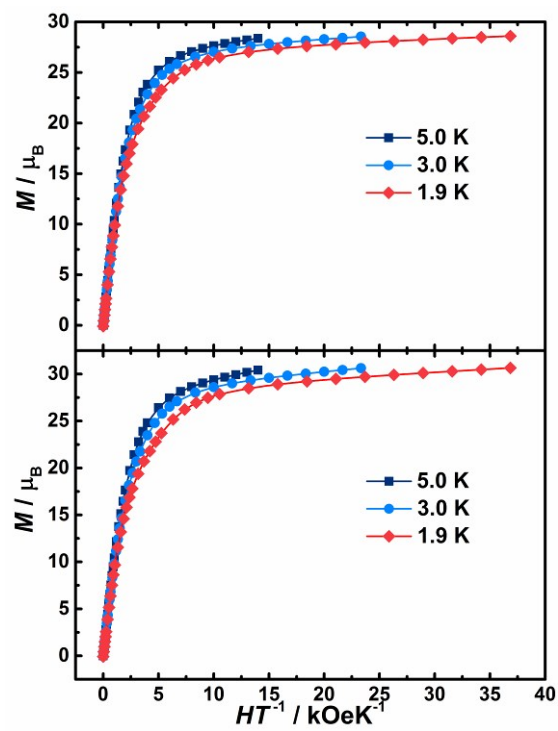

Fig. S2  $M$  vs.  $H/T$  plots for complexes  $\text{Dy}_6\text{-SCN}$  (top) and  $\text{Dy}_6\text{-NO}_3$  (bottom) at various temperatures between 1.9 and 5 K.

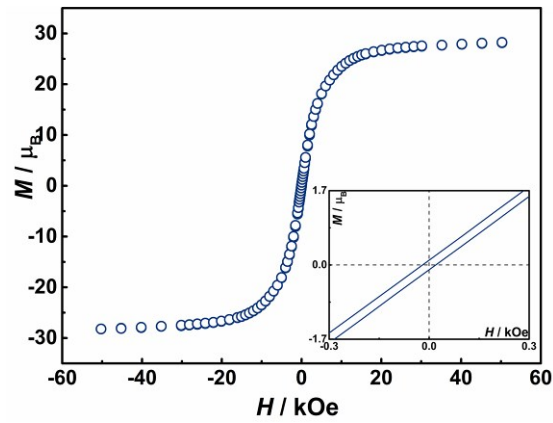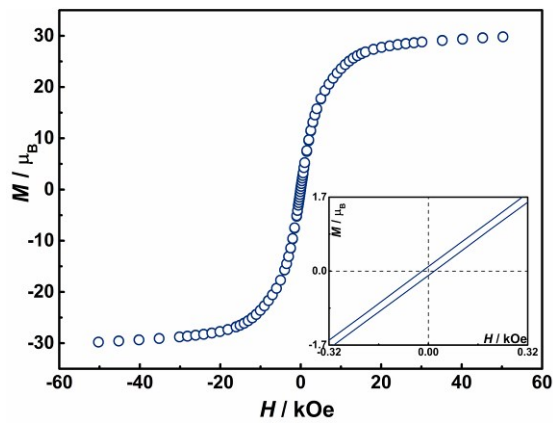

Fig. S3 Hysteresis loop for complexes  $\text{Dy}_6\text{-SCN}$  (top) and  $\text{Dy}_6\text{-NO}_3$  (bottom) at 1.9 K, showing a narrow hysteresis for  $\text{Dy}_6\text{-SCN}$  and  $\text{Dy}_6\text{-NO}_3$ , respectively. (Inset figures).



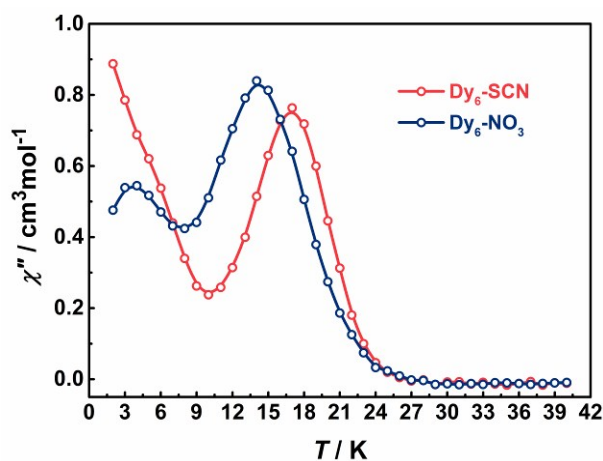

Fig. S4 Temperature dependence of the ( $\chi''$ ) ac susceptibility components under zero dc-field and at 1000 Hz ac frequency for  $\text{Dy}_6\text{-SCN}$  and  $\text{Dy}_6\text{-NO}_3$ .

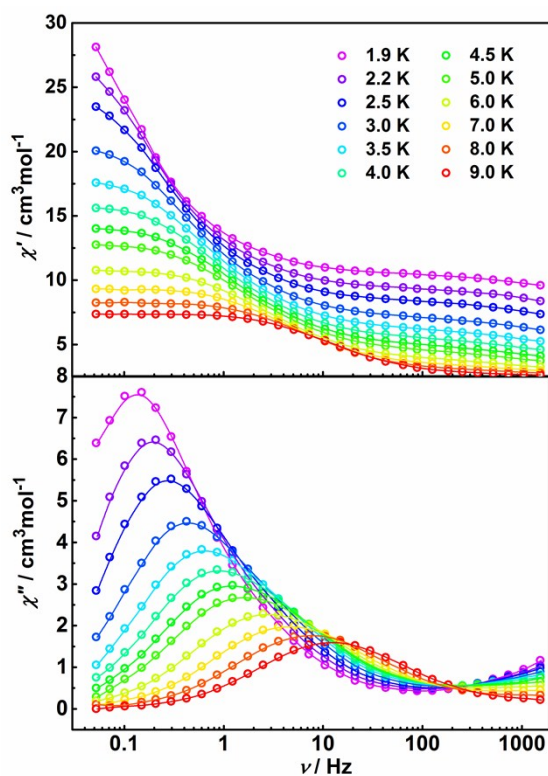

Fig. S5 Frequency dependence of the in-phase ( $\chi'$ ) and out-of-phase ( $\chi''$ ) ac susceptibility signals between 1.9–9 K for  $\text{Dy}_6\text{-SCN}$  under zero dc-field. The solid lines represent fitting of the experimental data at different temperatures using sum of two modified Debye functions based on two relaxation progresses.

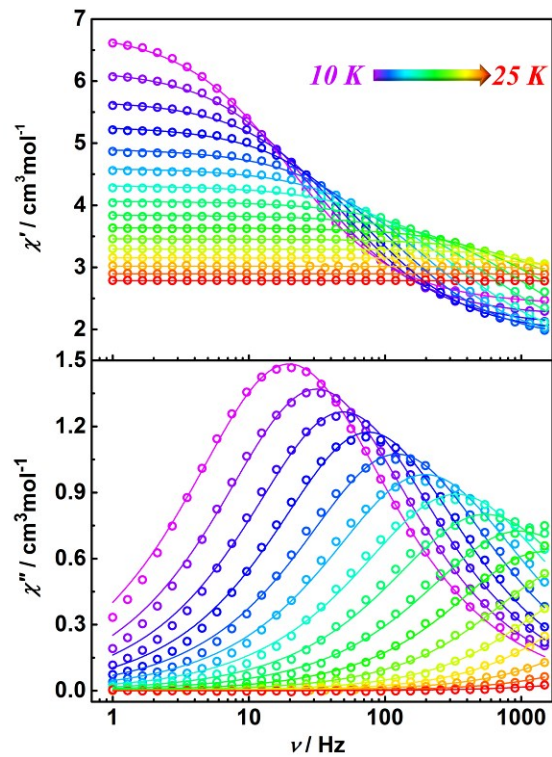

Fig. S6 Frequency dependence of the in-phase ( $\chi'$ ) and out-of-phase ( $\chi''$ ) ac susceptibility signals between 10–25 K for  $\text{Dy}_6\text{-SCN}$  under zero dc-field. The solid lines represent fitting of the experimental data at different temperatures using the generalized Debye model.

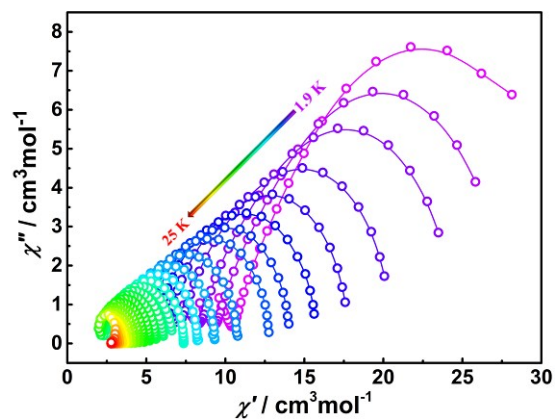

Fig. S7 Cole–Cole plots for temperatures between 1.9 and 25 K for  $\text{Dy}_6\text{-SCN}$  under a zero dc field. The Solid lines are guide for eyes.

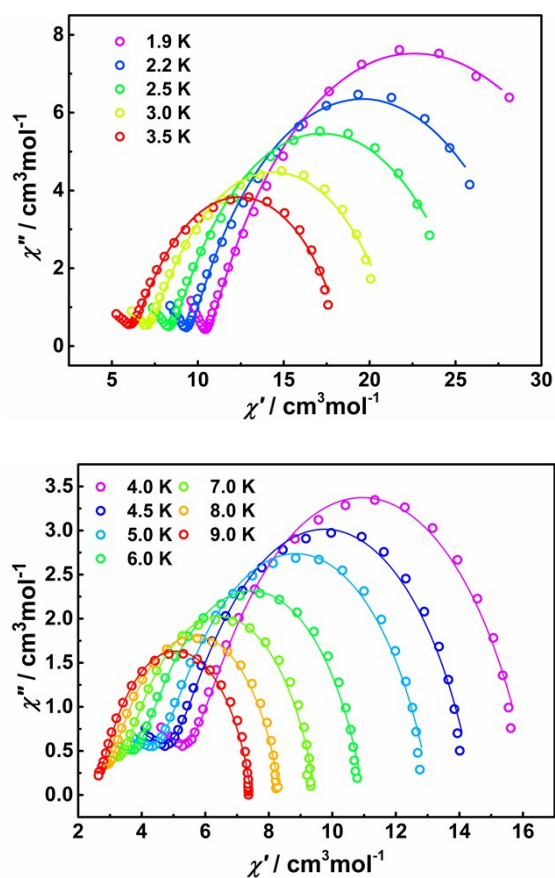

Fig. S8 Cole–Cole plots for temperatures between 1.9–3.5 and 4–9 K under a zero dc field with the best fit to the sum of two modified Debye functions based on two relaxation progresses for  $\text{Dy}_6\text{-SCN}$ . The Solid lines represent fits to the data, as described in the main text.

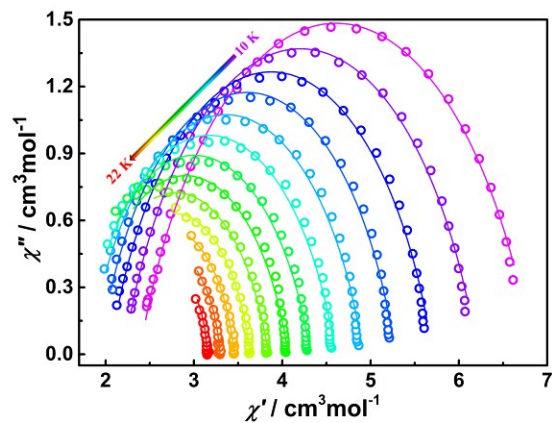

Fig. S9 Cole–Cole plots for temperatures between 10–22 K under a zero dc field with the best fit to the generalized Debye model for  $\text{Dy}_6\text{-SCN}$ . The Solid lines represent fits to the data, as described in the main text.

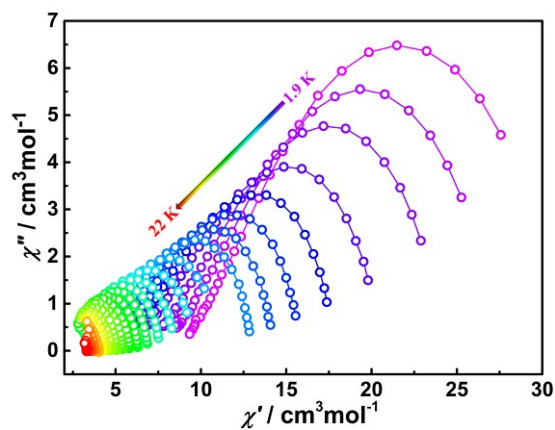

Fig. S10 Cole–Cole plots for temperatures between 1.9 and 22 K for  $\text{Dy}_6\text{-NO}_3$  under a zero dc field. The Solid lines are guide for eyes.

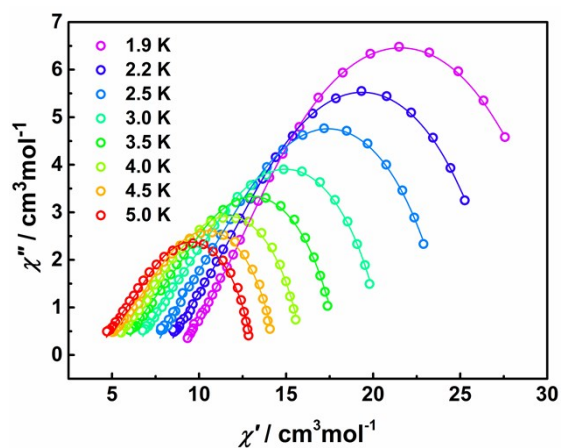

Fig. S11 Cole–Cole plots for temperatures between 1.9–5 K under a zero dc field with the best fit to the generalized Debye model for  $\text{Dy}_6\text{-NO}_3$ . The Solid lines represent fits to the data, as described in the main text.

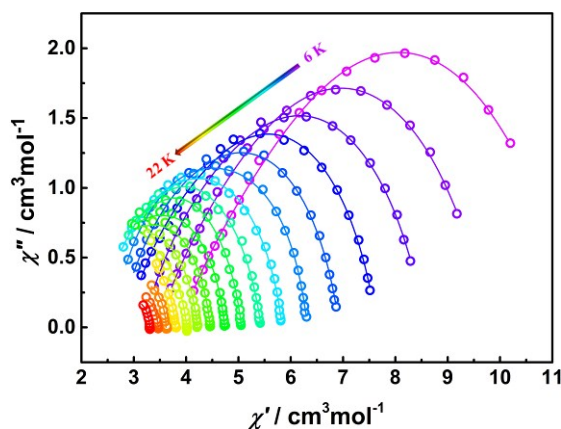

Fig. S12 Cole–Cole plots for temperatures between 6–22 K under a zero dc field with the best fit to the generalized Debye model for  $\text{Dy}_6\text{-NO}_3$ . The Solid lines represent fits to the data, as described in the main text.

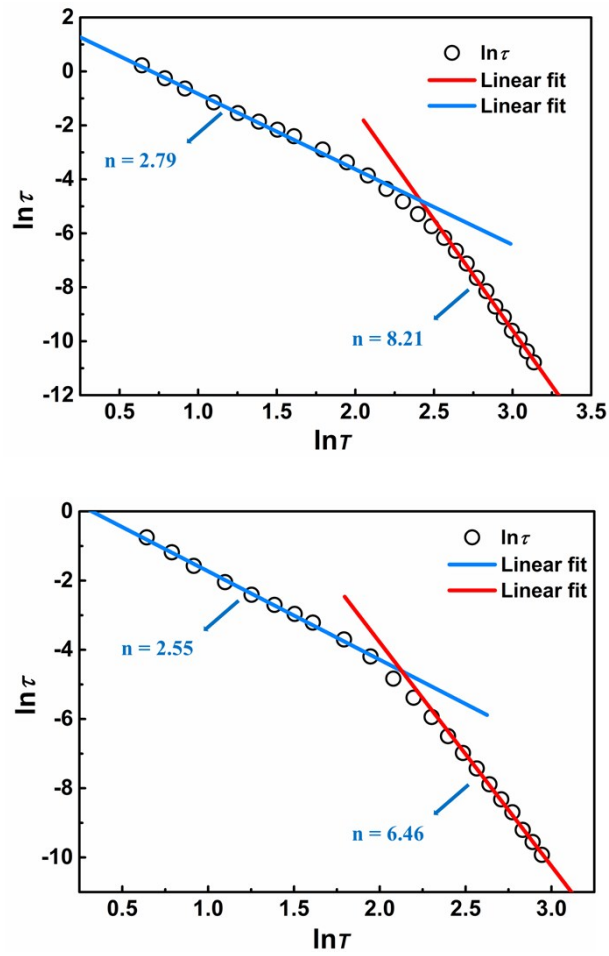

Fig. S13 Plot of  $\ln \tau$  versus  $\ln T$  for complexes  $\text{Dy}_6\text{-SCN}$  (top) and  $\text{Dy}_6\text{-NO}_3$  (bottom) under zero dc field. The solid lines are linear fitting results.

Table S5. Relaxation fitting parameters for Cole-Cole plots of **Dy<sub>6</sub>-SCN** at varying temperatures under zero applied dc-field using the sum of two modified Debye model.<sup>3</sup>

| $T$ (K) | $\chi_{s, \text{tot}}$ | $\Delta\chi^1$ | $\Delta\chi^2$ | $\alpha_1$ | $\alpha_2$ |
|---------|------------------------|----------------|----------------|------------|------------|
| 1.9     | 0.902E-10              | 10.7           | 23.9           | 0.485      | 0.282      |
| 2.2     | 0.269E-09              | 9.76           | 19.7           | 0.577      | 0.270      |
| 2.5     | 0.297E-09              | 8.76           | 17.1           | 0.580      | 0.274      |
| 3.0     | 0.489E-09              | 7.51           | 14.0           | 0.595      | 0.277      |
| 3.5     | 0.834E-09              | 6.58           | 11.9           | 0.596      | 0.275      |
| 4.0     | 0.108E-08              | 5.88           | 10.4           | 0.602      | 0.273      |
| 4.5     | 0.159E-08              | 5.32           | 9.17           | 0.597      | 0.267      |
| 5.0     | 0.255E-08              | 4.93           | 8.18           | 0.615      | 0.260      |
| 6.0     | 0.235E-08              | 4.17           | 6.82           | 0.595      | 0.252      |
| 7.0     | 0.527E-08              | 3.65           | 5.82           | 0.600      | 0.237      |
| 8.0     | 0.188E-07              | 3.16           | 5.20           | 0.578      | 0.233      |
| 9.0     | 0.499E-08              | 2.78           | 4.66           | 0.575      | 0.224      |

Table S6. The best fitting parameters for Cole-Cole plots of **Dy<sub>6</sub>-SCN** at varying temperatures under zero applied dc field.

| $T$ (K) | $\chi_T$ | $\chi_S$ | $\alpha$ |
|---------|----------|----------|----------|
| 10      | 6.833    | 2.383    | 0.249    |
| 11      | 6.207    | 2.204    | 0.233    |
| 12      | 5.702    | 2.046    | 0.226    |
| 13      | 5.280    | 1.925    | 0.220    |
| 14      | 4.915    | 1.808    | 0.227    |
| 15      | 4.602    | 1.737    | 0.232    |
| 16      | 4.319    | 1.686    | 0.239    |
| 17      | 4.067    | 1.748    | 0.228    |
| 18      | 3.842    | 1.756    | 0.224    |
| 19      | 3.638    | 1.934    | 0.186    |
| 20      | 3.458    | 2.001    | 0.165    |
| 21      | 3.295    | 2.208    | 0.115    |
| 22      | 3.151    | 2.289    | 0.0757   |



Table S7. The best fitting parameters for Cole-Cole plots of  $\mathbf{D}_{y_6}\text{-NO}_3$  at varying temperatures under zero applied dc field.

| $T$ (K) | $\chi_T$ | $\chi_S$ | $\alpha$ |
|---------|----------|----------|----------|
| 1.9     | 34.5     | 9.62     | 0.409    |
| 2.2     | 30.2     | 8.74     | 0.421    |
| 2.5     | 26.5     | 7.93     | 0.427    |
| 3.0     | 22.2     | 6.91     | 0.431    |
| 3.5     | 19.1     | 6.16     | 0.428    |
| 4.0     | 16.8     | 5.59     | 0.419    |
| 4.5     | 15.0     | 5.12     | 0.409    |
| 5.0     | 13.6     | 4.76     | 0.396    |
| 6.0     | 12.0     | 4.03     | 0.424    |
| 7.0     | 10.1     | 3.60     | 0.389    |
| 8.0     | 8.76     | 3.26     | 0.358    |
| 9.0     | 7.79     | 2.99     | 0.331    |
| 10      | 7.01     | 2.81     | 0.306    |
| 11      | 6.39     | 2.58     | 0.291    |
| 12      | 5.88     | 2.44     | 0.279    |
| 13      | 5.45     | 2.42     | 0.254    |
| 14      | 5.08     | 2.35     | 0.239    |
| 15      | 4.76     | 2.33     | 0.242    |
| 16      | 4.47     | 2.34     | 0.227    |
| 17      | 4.23     | 2.26     | 0.228    |
| 18      | 4.02     | 2.29     | 0.219    |
| 19      | 3.80     | 1.93     | 0.252    |
| 20      | 3.62     | 2.86     | 0.137    |
| 21      | 3.47     | 2.95     | 0.151    |
| 22      | 3.31     | 2.88     | 0.127    |

## References

- 1 V. P. K. M. B. Bushuev, N. V. Semikolenova, Yu. G. Shvedenkov, L. A., G. G. M. Sheludyakova, L. G. Lavrenova, V. A. Zakharov, and S. V. and Larionov, *Russ. J. Coord. Chem.*, 2007, **33**, 601.
- 2 (a) G. M. Sheldrick, *Acta Crystallogr. A*, 2008, **64**, 112; (b) O. V. Dolomanov, L. J. Bourhis, R. J. Gildea, J. A. K. Howard and H. Puschmann, *J. Appl. Crystallogr.*, 2009, **42**, 339.
- 3 Y.-N. Guo, G.-F. Xu, Y. Guo and J. Tang, *Dalton Trans.*, 2011, **40**, 9953.
